# Supplementary material for: Room-temperature conversion of Cu2−xSe to CuAgSe nanoparticles to enhance the photocatalytic performance of their composites with TiO2
Source: Royal Society of Chemistry journal article supplement (doi:10.1039/c9dt04726c), 2020-01-01
Supplement: c9dt04726c1.pdf [file c9dt04726c1.pdf]

## Supporting Information

# **Room-temperature conversion of $\text{Cu}_{2-x}\text{Se}$ to $\text{CuAgSe}$ nanoparticles to enhance the photocatalytic performance of their composites with $\text{TiO}_2$**

*Sweta Gahlot,<sup>1</sup> Frederic Dappozze,<sup>1</sup> Deobrat Singh,<sup>2</sup> Rajeev Ahuja,<sup>2</sup> Luis Cardenas,<sup>1</sup> Laurence Burel,<sup>1</sup> David Amans,<sup>3</sup> Chantal Guillard,<sup>1</sup> Shashank Mishra\*<sup>1</sup>*

<sup>1</sup>Université Claude Bernard Lyon 1, CNRS, UMR 5256, Institut de Recherches sur la Catalyse et l'Environnement de Lyon (IRCELYON), 2 avenue Albert Einstein, 69626 Villeurbanne, France.

<sup>2</sup> Condensed Matter Theory Group, Department of Physics and Astronomy, Uppsala University, Box 516, 75120 Uppsala, Sweden.

<sup>3</sup> Université Claude Bernard Lyon 1, CNRS, Institut Lumière Matière (ILM), 69626 Villeurbanne, France.

E-mail : [shashank.mishra@ircelyon.univ-lyon1.fr](mailto:shashank.mishra@ircelyon.univ-lyon1.fr) (SM)

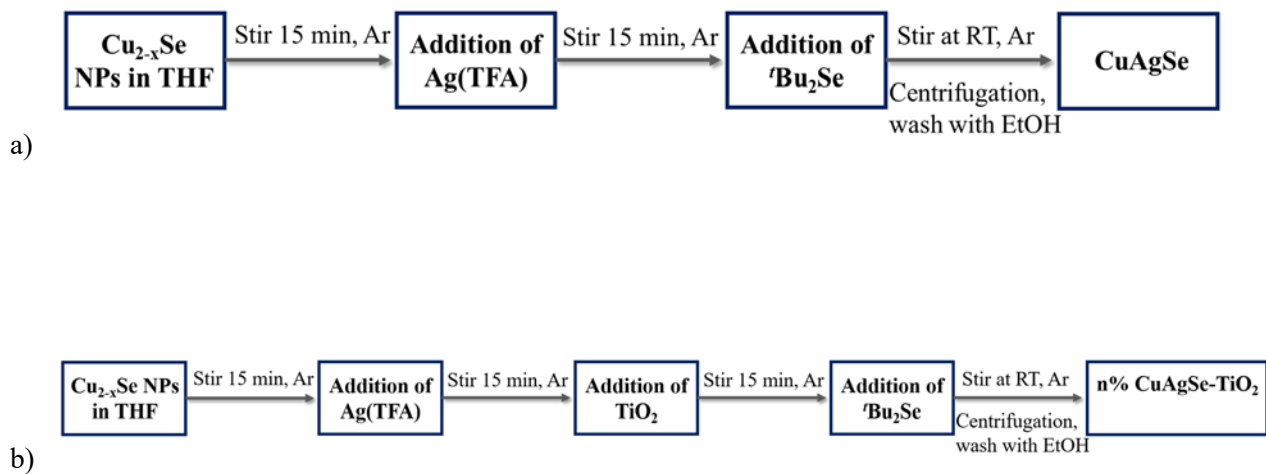

**Figure S1.** Schematic representation of the synthesis of the a) CuAgSe NPs and b) *n*% CuAgSe-TiO<sub>2</sub> nanocomposites.

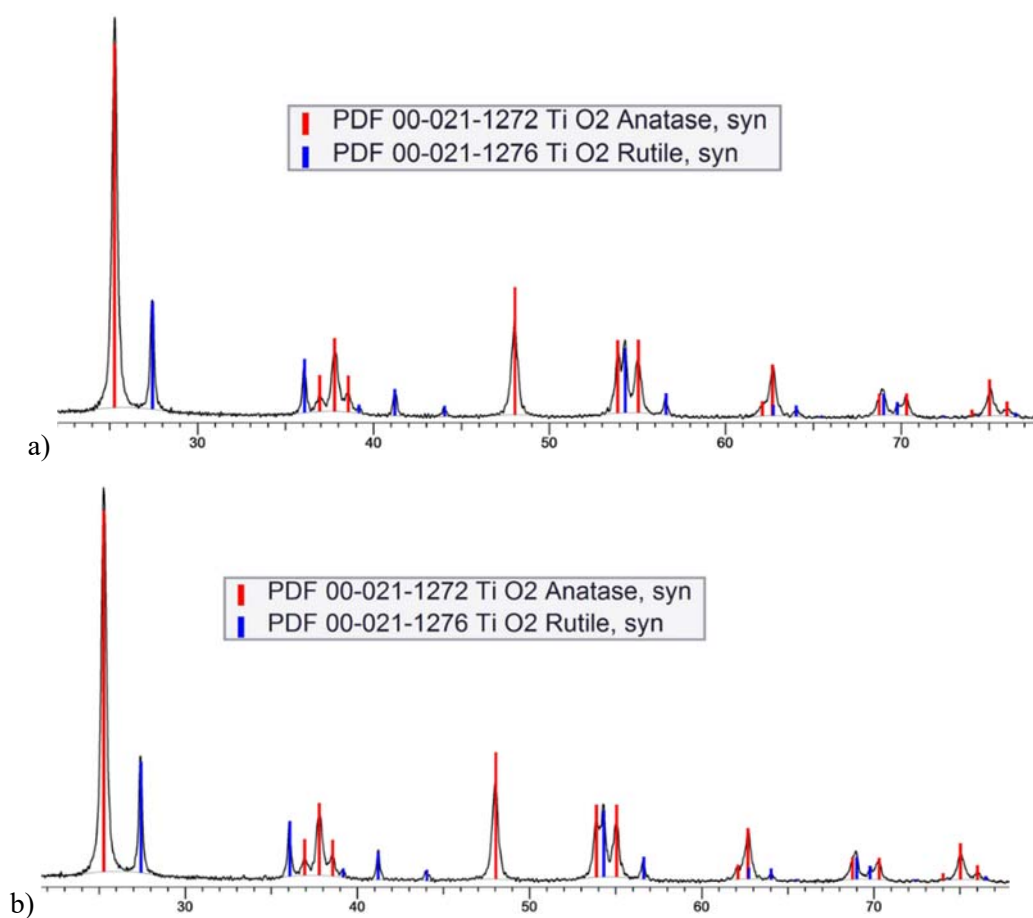

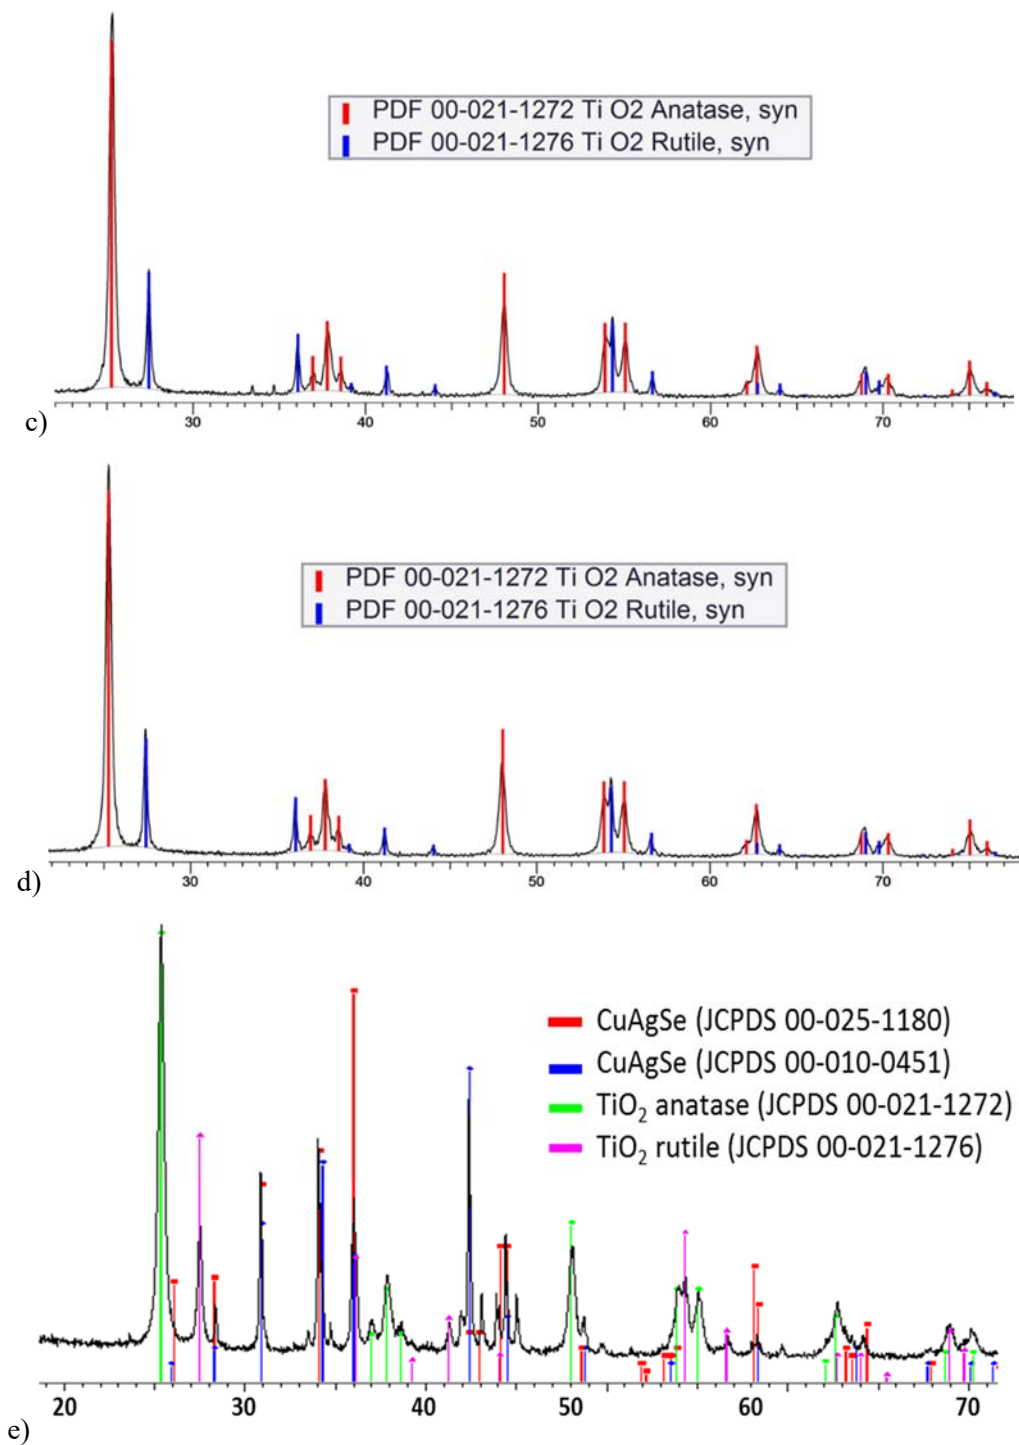

**Figure S2.** XRD patterns of n mol% CuAgSe-TiO<sub>2</sub> nanocomposites obtained from Cu<sub>2-x</sub>Se, Ag(TFA), <sup>t</sup>Bu<sub>2</sub>Se and TiO<sub>2</sub> when stirred at room temperature for 6h. (a) 0.01% CuAgSe-TiO<sub>2</sub>, (b) 0.1% CuAgSe-TiO<sub>2</sub>, (c) 0.3% CuAgSe-TiO<sub>2</sub>, (d) 1% CuAgSe-TiO<sub>2</sub>, and (e) 10% CuAgSe-TiO<sub>2</sub>.

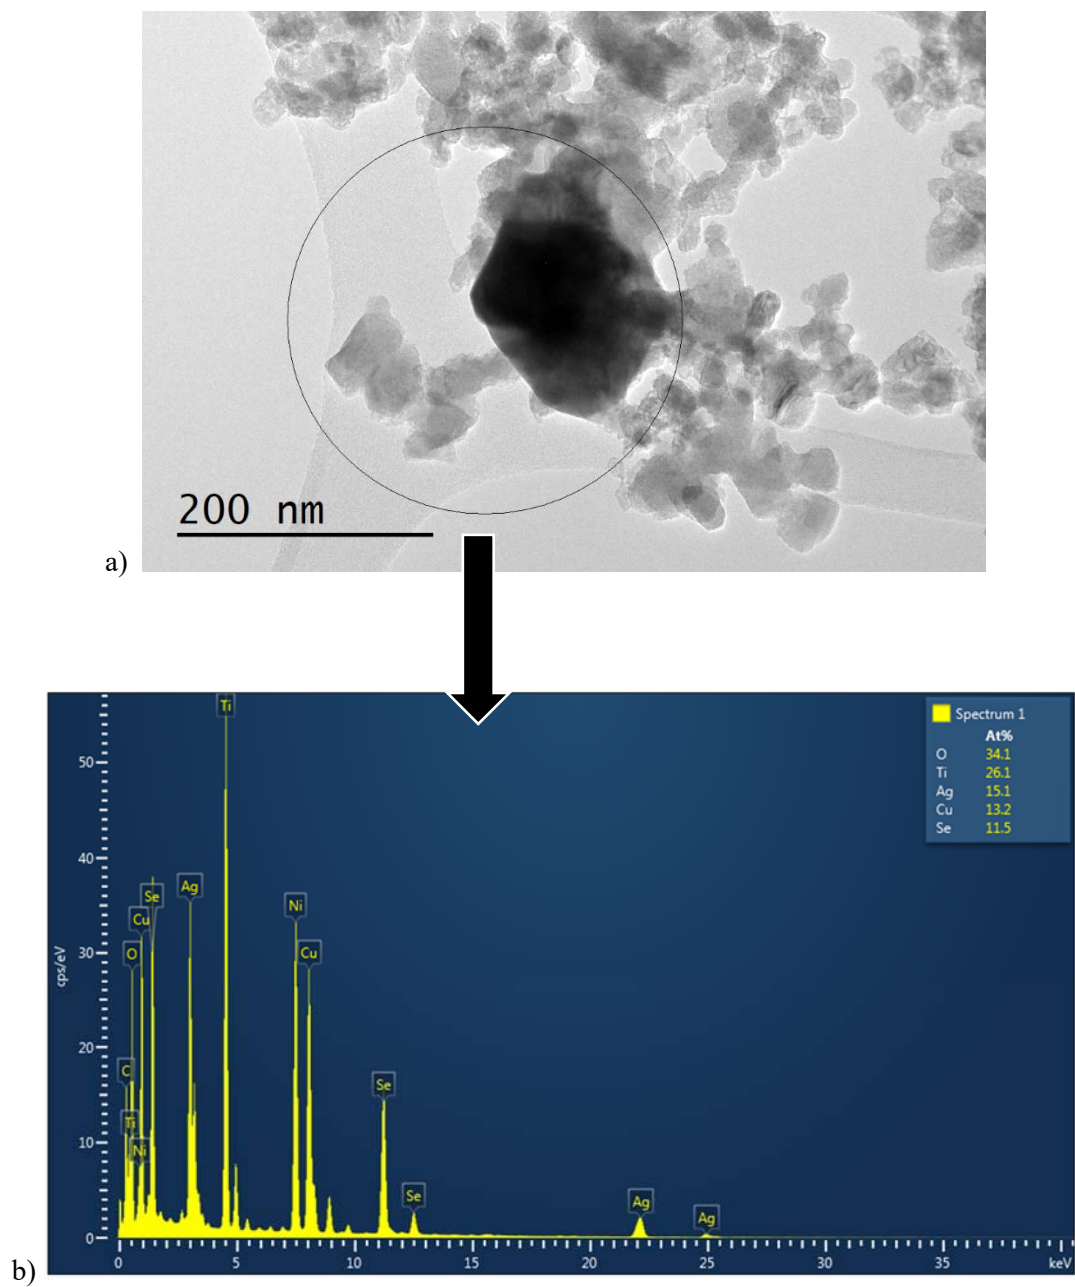

**Figure S3.** TEM image (a) and associated EDX analysis (b) of 10% CuAgSe-TiO<sub>2</sub> nanocomposites.

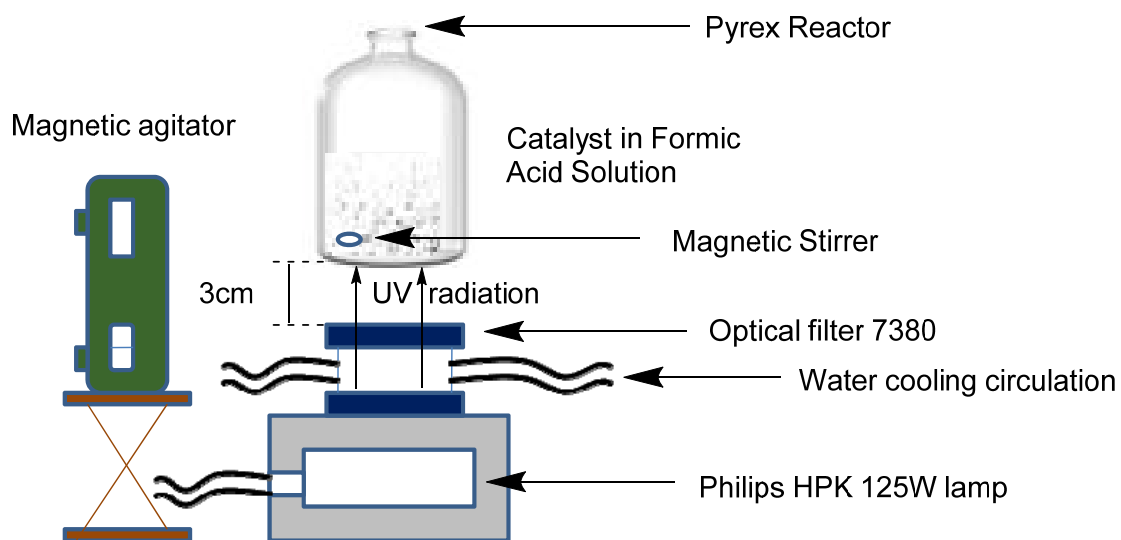

**Figure S4.** The experimental setup for FA photodegradation under UV light.

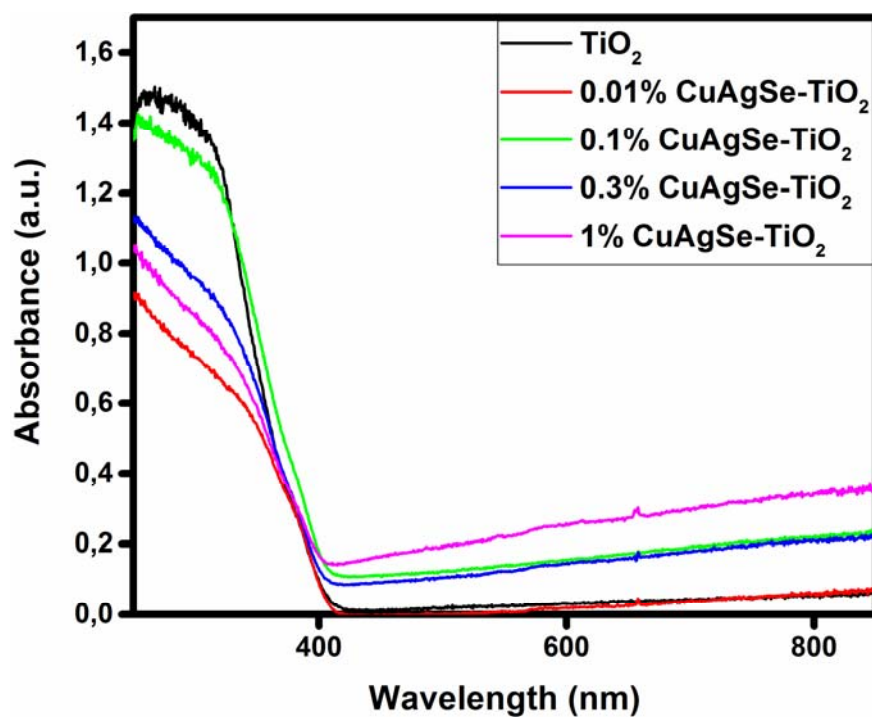

**Figure S5.** Absorbance spectra for n%  $\text{CuAgSe-TiO}_2$  nanocomposites.

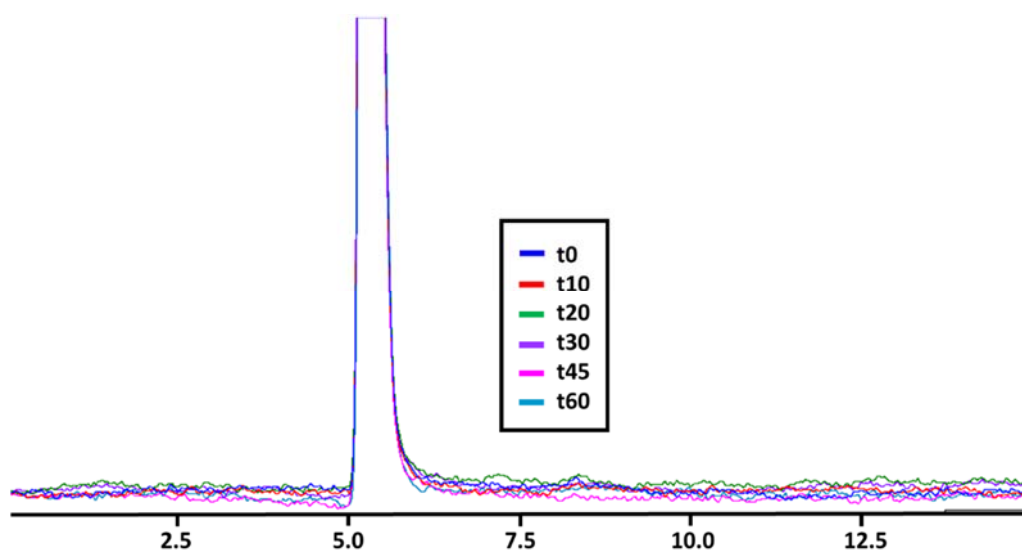

**Figure S6.** HPLC result after stability test using 0.3% CuAgSe-TiO<sub>2</sub> under acidic conditions (HNO<sub>3</sub>).

**Table S1.** N<sub>2</sub> adsorption and desorption isotherm and related data of TiO<sub>2</sub> and CuAgSe-TiO<sub>2</sub> nanocomposites.

| Sample Name                   | Surface area (m <sup>2</sup> /g) | Total pore volume (cm <sup>3</sup> /g) | Av. Pore diameter (nm) |
|-------------------------------|----------------------------------|----------------------------------------|------------------------|
| TiO <sub>2</sub>              | 58.9                             | 0.23                                   | 15.6                   |
| 0.01% CuAgSe-TiO <sub>2</sub> | 53.7                             | 0.52                                   | 38.9                   |
| 0.1% CuAgSe-TiO <sub>2</sub>  | 52.4                             | 0.49                                   | 37.5                   |
| 0.3% CuAgSe-TiO <sub>2</sub>  | 51.2                             | 0.41                                   | 32                     |
| 1% CuAgSe-TiO <sub>2</sub>    | 54.9                             | 0.24                                   | 17.6                   |
